# Supplementary material
Source: PubMed Central journal article supplement (PMC4390654)
Supplement: JCM.02827-14_zjm999094076so1.pdf [file JCM.02827-14_zjm999094076so1.pdf]

## Supplementary materials.

1. Breitkopf C, Hammel D, Scheld HH, Peters G, Becker K. Impact of a molecular approach to improve the microbiological diagnosis of infective heart valve endocarditis. *Circulation*. 2005;111(11):1415-1421.
2. Kreisel D, Pasque MK, Damiano RJ, Jr. et al. *Bartonella* species-induced prosthetic valve endocarditis associated with rapid progression of valvular stenosis. *J Thorac Cardiovasc Surg*. 2005;130(2):567-568.
3. Goldstein LH, Saliba WR, Elias M, Zlotnik A, Raz R, Giladi M. *Bartonella quintana* endocarditis in east Africa. *Eur J Intern Med*. 2005;16(7):518-519.
4. Christiansen S, Fehske W, Autschbach R. Aortic valve endocarditis with *Bartonella quintana* - a rare entity. *Herz*. 2005;30(8):761-763.
5. Walls T, Moshal K, Trounce J, Hartley J, Harris K, Davies G. Broad-range polymerase chain reaction for the diagnosis of *Bartonella henselae* endocarditis. *J Paediatr Child Health*. 2006;42(7-8):469-471.
6. Rahimian J, Raoult D, Tang YW, Hanna BA. *Bartonella quintana* endocarditis with positive serology for *Coxiella burnetii*. *J Infect*. 2006;53(3):e151-e153.
7. Seve P, Turner R, Stankovic K, Perard L, Broussolle C. Transient monoclonal gammopathy in a patient with *Bartonella quintana* endocarditis. *Am J Hematol*. 2006;81(2):115-117.

8. Kotilainen P, Heiro M, Jalava J et al. Aetiological diagnosis of infective endocarditis by direct amplification of rRNA genes from surgically removed valve tissue. An 11-year experience in a Finnish teaching hospital. *Ann Med.* 2006;38(4):263-273.
9. Oteo JA, Castilla A, Arosey A, Blanco JR, Ibarra V, Morano LE. Endocarditis due to *Bartonella* spp. Three new clinical cases and Spanish literature review. *Enferm Infecc Microbiol Clin.* 2006;24(5):297-301.
10. Sondermeijer HP, Claas EC, Orendi JM, Tamsma JT. *Bartonella quintana* prosthetic valve endocarditis detected by blood culture incubation beyond 10 days. *Eur J Intern Med.* 2006;17(6):441-443.
11. Pitchford CW, Creech CB, Peters TR, Vnencak-Jones CL. *Bartonella henselae* endocarditis in a child. *Pediatr Cardiol.* 2006;27(6):769-771.
12. Siciliano RF, Strabelli TM, Zeigler R et al. Infective endocarditis due to *Bartonella* spp. and *Coxiella burnetii*: experience at a cardiology hospital in Sao Paulo, Brazil. *Ann N Y Acad Sci.* 2006;1078:215-222.
13. Woolley MW, Gordon DL, Wetherall BL. Analysis of the first Australian strains of *Bartonella quintana* reveals unique genotypes. *J Clin Microbiol.* 2007;45(6):2040-2043.
14. Fu J, Muttaiyah S, Pandey S, Thomas M. Two cases of endocarditis due to *Bartonella henselae*. *N Z Med. J* 2007;120(1255):U2558.
15. Marin M, Munoz P, Sanchez M et al. Molecular diagnosis of infective endocarditis by real-time broad-range polymerase chain reaction (PCR) and sequencing directly from heart valve tissue. *Medicine (Baltimore).* 2007;86(4):195-202.

16. Vikram HR, Bacani AK, DeValeria PA, Cunningham SA, Cockerill FR, III. Bivalvular *Bartonella henselae* prosthetic valve endocarditis. *J Clin Microbiol.* 2007;45(12):4081-4084.
17. Gunson TH, Oliver GF. Osler's nodes and Janeway lesions. *Australas J Dermatol.* 2007;48(4):251-255.
18. Schneer S, Marcoviciu D, Beilin V, Goffman M, Dicker D. Stroke as a manifestation of acute *Bartonella henselae* endocarditis. *Harefuah.* 2007;146(11):902-4, 908.
19. Lamas C, Favacho A, Ramos RG et al. *Bartonella* native valve endocarditis: the first Brazilian case alive and well. *Braz J Infect Dis.* 2007;11(6):591-594.
20. Hoffman RM, AboulHosn J, Child JS, Pegues DA. Bartonella endocarditis in complex congenital heart disease. *Congenit Heart Dis.* 2007;2(1):79-84.
21. Garre L, Guaraglia W, Cuatz D, Kaufman S, Gil H, De Rosa AF. Infective endocarditis due to *Bartonella quintana*. *Medicina (B Aires).* 2008;68(2):144-146.
22. Yerebakan C, Westphal B, Aepinus C. Infective endocarditis due to *Bartonella quintana*: a challenging diagnostic entity. *Acta Cardiol.* 2008;63(4):519-521.
23. Gescher DM, Mallmann C, Kovacevic D et al. A view on *Bartonella quintana* endocarditis--confirming the molecular diagnosis by specific fluorescence in situ hybridization. *Diagn Microbiol Infect Dis.* 2008;60(1):99-103.
24. Vento A, Patila T, Vaara M, Larinkari U, Sipponen J. *Bartonella quintana* and *Bartonella pediococcus* Infection after Aortic Valve Replacement. *Heart Surg Forum.* 2008;11(2):E94-E95.

25. Dreier J, Vollmer T, Freytag CC, Baumer D, Korfer R, Kleesiek K. Culture-negative infectious endocarditis caused by *Bartonella* spp.: 2 case reports and a review of the literature. *Diagn Microbiol Infect Dis*. 2008;61(4):476-483.
26. Lejko-Zupanc T, Slemenik-Pusnik C, Kozelj M et al. Native valve endocarditis due to *Bartonella henselae* in an immunocompetent man. *Wien Klin Wochenschr*. 2008;120(7-8):246-249.
27. Yoda M, Hata M, Sezai A, Unosawa S, Furukawa N, Minami K. First report of *Bartonella quintana* endocarditis in Japan. *Circ J*. 2008;72(6):1022-1024.
28. De Clerck KF, Van Offel JF, Vlieghe E, Van ME, Stevens WJ. *Bartonella* endocarditis mimicking adult Still's disease. *Acta Clin Belg*. 2008;63(3):190-192.
29. Tang YW. Duplex PCR assay simultaneously detecting and differentiating *Bartonella quintana*, *B. henselae*, and *Coxiella burnetii* in surgical heart valve specimens. *J Clin Microbiol*. 2009;47(8):2647-2650.
30. Das BB, Wasser E, Bryant KA, Woods CR, Yang SG, Zahn M. Culture negative endocarditis caused by *Bartonella henselae* in a child with congenital heart disease. *Pediatr Infect Dis J*. 2009;28(10):922-925.
31. Jenkins NE, Ferguson DJ, Alp NJ, Harrison TG, Bowler IC. Urban trench fever presenting as culture-negative endocarditis. *QJM*. 2009;102(1):63-65.
32. Ehrenborg C, Hagberg S, Alden J et al. First known case of *Bartonella quintana* endocarditis in Sweden. *Scand J Infect Dis*. 2009;41(1):73-75.

33. de La BA, Fournier PE, Haustraete E, du CD, Lepage O, Verdon R. Infective endocarditis due to *Bartonella henselae* following a rupture of a cerebral aneurysm. *Med Mal Infect.* 2009;39(6):394-396.
34. Al-Attar N, Ruimy R, Baron F, Hvass U. *Bartonella* endocarditis complicating congenital heart disease. *BMJ Case Rep.* 2009;2009.
35. Barbier F, Fournier PE, Dauge MC et al. *Bartonella quintana* coinfection in *Staphylococcus aureus* endocarditis: usefulness of screening in high-risk patients? *Clin Infect Dis.* 2009;48(9):1332-1333.
36. Martin L, Vidal L, Campins A et al. *Bartonella* as a cause of blood culture-negative endocarditis. Description of five cases. *Rev Esp Cardiol.* 2009;62(6):694-697.
37. Sugiyama H, Sahara M, Imai Y et al. Infective endocarditis by *Bartonella quintana* masquerading as antineutrophil cytoplasmic antibody-associated small vessel vasculitis. *Cardiology.* 2009;114(3):208-211.
38. Moncriol A, Benard F, Fenollar F et al. Fatal myocarditis-associated *Bartonella quintana* endocarditis: a case report. *J Med Case Rep.* 2009;3:7325.
39. Sureda A, Garcia D, Loma-Osorio P. Embolic stroke as the first manifestation of *Bartonella henselae* endocarditis in an immunocompetent patient. *Enferm Infecc Microbiol Clin.* 2010;28(1):64-65.
40. Baty G, Lanotte P, Hocqueloux L et al. PCR rDNA 16S used for the etiological diagnosis of blood culture negative endocarditis. *Med Mal Infect.* 2010;40(6):358-362.
41. Teoh LS, Hart HH, Soh MC et al. *Bartonella henselae* aortic valve endocarditis mimicking systemic vasculitis. *BMJ Case Rep.* 2010;2010.

42. Tsuneoka H, Yanagihara M, Otani S et al. A first Japanese case of *Bartonella henselae*-induced endocarditis diagnosed by prolonged culture of a specimen from the excised valve. *Diagn Microbiol Infect Dis*. 2010;68(2):174-176.
43. Gupta D, Green J, Franco-Paredes C, Lerakis S. Challenges in the clinical management of blood-culture negative endocarditis: case of *Bartonella henselae* infection. *Am J Med*. 2011;124(3):e1-e2.
44. Satake K, Ohsawa I, Kobayashi N et al. Three cases of PR3-ANCA positive subacute endocarditis caused by attenuated bacteria (*Propionibacterium*, *Gemella*, and *Bartonella*) complicated with kidney injury. *Mod Rheumatol*. 2011;21(5):536-541.
45. Atamanyuk I, Raja SG, Kostolny M. *Bartonella henselae* endocarditis of percutaneously implanted pulmonary valve: a case report. *J Heart Valve Dis*. 2011;20(1):94-97.
46. Sankatsing SU, Kolader ME, Bouma BJ et al. 18F-fluoro-2-deoxyglucose positron emission tomography-negative endocarditis lenta caused by *Bartonella henselae*. *J Heart Valve Dis*. 2011;20(1):100-102.
47. Yamada Y, Ohkusu K, Yanagihara M et al. Prosthetic valve endocarditis caused by *Bartonella quintana* in a patient during immunosuppressive therapies for collagen vascular diseases. *Diagn Microbiol Infect Dis*. 2011;70(3):395-398.
48. Karris MY, Litwin CM, Dong HS, Vinetz J. *Bartonella henselae* infection of prosthetic aortic valve associated with colitis. *Vector Borne Zoonotic Dis*. 2011;11(11):1503-1505.

49. Shahani L. Culture negative endocarditis: a diagnostic and therapeutic challenge! *BMJ Case Rep.* 2011;2011.
50. Idrees J, Albacker TB, Gordon SM, Shin J, Menon V, Roselli EE. *Bartonella* infective endocarditis of a prosthetic aortic valve with a subvalvular abscess. *J Card Surg.* 2011;26(5):483-485.
51. Alozie A, Yerebakan C, Westphal B, Podbielski A. *Bartonella quintana* endocarditis of the tricuspid and mitral valves. *Thorac Cardiovasc Surg.* 2012;60(5):363-365.
52. Abandeh FI, Bazan JA, Davis JA, Zaidi AN, Daniels CJ, Firstenberg MS. *Bartonella henselae* prosthetic valve endocarditis in an adult patient with congenital heart disease: favorable outcome after combined medical and surgical management. *J Card Surg.* 2012;27(4):449-452.
53. Hajj-Chahine J, Houmaida H, Plouzeau C, Tomasi J, Corbi P. *Bartonella* as a cause of mechanical prosthetic aortic root endocarditis. *Ann Thorac Surg.* 2012;93(4):e93-e95.
54. Lim MH, Chung DR, Kim WS et al. First case of *Bartonella quintana* endocarditis in Korea. *J Korean Med Sci.* 2012;27(11):1433-1435.
55. Dimopoulos S, Eleftherakis E, Charitos C et al. *Bartonella quintana* endocarditis as a cause of severe aortic insufficiency and heart failure. *Hellenic J Cardiol.* 2012;53(6):476-479.
56. Chaloner GL, Harrison TG, Birtles RJ. *Bartonella* species as a cause of infective endocarditis in the UK. *Epidemiol Infect.* 2013;141(4):841-846.

57. Lamas CC, Ramos RG, Lopes GQ et al. *Bartonella* and *Coxiella* infective endocarditis in Brazil: molecular evidence from excised valves from a cardiac surgery referral center in Rio de Janeiro, Brazil, 1998 to 2009. *Int J Infect Dis.* 2013;17(1):e65-e66.
58. Salvado C, Mekinian A, Rouvier P, Poignard P, Pham I, Fain O. Rapidly progressive crescentic glomerulonephritis and aneurism with antineutrophil cytoplasmic antibody: *Bartonella henselae* endocarditis. *Presse Med* 2013;42(6 Pt 1):1060-1061.
59. Dzupova O, Pekova S, Sojkova N, Feuereisl R, Benes J. Infective endocarditis due to *Bartonella quintana*: a severe disease and underdiagnosed etiology. *Folia Microbiol (Praha)* 2013;58(6):491-494.
